# Supplementary material for: Discovery of Novel Potential Prognostic Marker and Targeted Therapy to Overcome Chemotherapy Resistance in an Advanced Stage Wilms’ Tumor
Source: Preprints.org preprint supplement (doi:10.20944/preprints202404.1167.v1), 2024-04-17
Supplement: Supplementary file 1 [file supplementary]

| Supplementary Table S2 The potential targeted drugs for the driver mutations in chemotherapy-resistant WT |                                     |                                                                       |                   |            |                                |
|-----------------------------------------------------------------------------------------------------------|-------------------------------------|-----------------------------------------------------------------------|-------------------|------------|--------------------------------|
| Gene                                                                                                      | Amino acid change                   | Potential chemotherapy                                                | Disease*          | Response   | Level of evidence <sup>#</sup> |
| <i>KIT</i>                                                                                                | p.L862M                             | KIT inhibitor (Imatinib)                                              | Melanoma          | Responsive | B                              |
|                                                                                                           |                                     | KIT inhibitor + Pan-TK inhibitor (Sunitinib + Sorafenib)              | Thymic cancer     |            | B                              |
|                                                                                                           |                                     | KIT inhibitor + PI3K inhibitor (Imatinib + Pictilisib)                | GIST              |            | D                              |
| <i>PALB2</i>                                                                                              | p.M723X                             | PARP inhibitor (Olaparib)                                             | Prostate cancer   | Responsive | A                              |
|                                                                                                           |                                     | PARP inhibitor                                                        | Pancreatic cancer |            | D                              |
|                                                                                                           |                                     | Antibiotic/antineoplastic agent (Mytomycin C)                         | Pancreatic cancer |            | C                              |
|                                                                                                           |                                     | Platinum-based Agent                                                  | Pancreatic cancer |            | C                              |
| <i>LRP1B</i>                                                                                              | p.S1148P (A159),<br>p.W3333L (A203) | Antibiotic/antineoplastic agent (Liposomal Doxorubicin)               | Ovarian cancer    | Resistant  | C                              |
| <i>SMAD4</i>                                                                                              | p.N369S                             | EGFR mAb inhibitor (Panitumumab + Cetuximab)                          | CRC               | Resistant  | B                              |
| <i>CDH1</i>                                                                                               | p.D433G                             | AR inhibitor (Bicalutamide)                                           | Breast cancer     | Responsive | D                              |
| <i>BRCA1</i>                                                                                              | p.Q262H                             | PARP inhibitor (Talazoparib, Olaparib)                                | Breast cancer     | Responsive | A, B                           |
|                                                                                                           |                                     | PARP inhibitor (Niraparib, Olaparib, Rucaparib)                       | Ovarian cancer    |            | A, B, B                        |
|                                                                                                           |                                     | PARP inhibitor (Olaparib, Rucaparib)                                  | Prostate cancer   |            | A, A                           |
|                                                                                                           |                                     | Combined PARP inhibitor (Talazoparib + Olaparib)                      | Breast cancer     |            | B                              |
|                                                                                                           |                                     | PARP inhibitor + VEGF mAb inhibitor (Olaparib + Bevacizumab)          | Ovarian cancer    |            | A                              |
|                                                                                                           |                                     | PARP inhibitor + VEGF inhibitor (Cediranib + Olaparib)                | Ovarian cancer    |            | B                              |
|                                                                                                           |                                     | Combine platinum-based agent (Carboplatin + Cisplatin)                | Breast cancer     |            | B                              |
|                                                                                                           |                                     | Platinum-based agent (Carboplatin, Cisplatin)                         | Ovarian cancer    |            | B                              |
|                                                                                                           |                                     | PARP inhibitor + Platinum-based agent (Veliparib + Cisplatin)         | Breast cancer     |            | C                              |
|                                                                                                           |                                     | WEE1 inhibitor                                                        | Any cancer type   |            | C                              |
| <i>CTNNB1</i>                                                                                             | p.S45F                              | Tankyrase inhibitors                                                  | CRC               | Resistant  | D                              |
| <i>DNMT3A</i>                                                                                             | p.V687F                             | Antibiotic/antineoplastic agent (Daunorubicin)                        | AML               | Responsive | A                              |
|                                                                                                           |                                     | Nucleoside analog (Decitabine)                                        | AML               |            | B                              |
|                                                                                                           |                                     | Combined PD1 Ab inhibitors (Pembrolizumab + Nivolumab + Atezolizumab) | Any cancer types  | Resistant  | B                              |
| <i>NF1</i>                                                                                                | p.P1421Q                            | MTOR inhibitor (Everolimus)*                                          | Neurofibroma      | Responsive | B                              |
|                                                                                                           |                                     | MEK inhibitors (Selumetinib)                                          | PNF               |            | B                              |
|                                                                                                           |                                     | MEK inhibitors (Trametinib)                                           | Glioma            |            | C                              |
|                                                                                                           |                                     | VEGFR mAb inhibitor (Bevacizumab)                                     | Glioma            |            | C                              |

|                |                                    |                                                                                                                                                                                                                                                                                                                                                                                                                                                                                                                                                                                                                                                                                                                                           |                                                                                                                                                                               |            |                                                                              |
|----------------|------------------------------------|-------------------------------------------------------------------------------------------------------------------------------------------------------------------------------------------------------------------------------------------------------------------------------------------------------------------------------------------------------------------------------------------------------------------------------------------------------------------------------------------------------------------------------------------------------------------------------------------------------------------------------------------------------------------------------------------------------------------------------------------|-------------------------------------------------------------------------------------------------------------------------------------------------------------------------------|------------|------------------------------------------------------------------------------|
|                |                                    | MTOR inhibitor + VEGFR inhibitor (Everolimus + Pazopanib)<br>MTOR inhibitor + EGFR inhibitor 1st gen (Sirolimus + Erlotinib)<br>KIT inhibitor (Imatinib)<br>PD1 Ab inhibitors<br>Tubulin inhibitors (Vinblastine)<br>Tubulin inhibitors + BCR-ABL inhibitor 2nd gen (Vinblastine + Nilotinib)<br>AURK inhibitors<br>BRD4 inhibitors<br>MEK inhibitors (Cobimetinib + Trametinib)<br>KIT inhibitor + MTOR inhibitors<br>MTOR inhibitor + HSP90 inhibitors<br>BCR-ABL inhibitor 2nd gen (Nilotinib)<br>Pan-TK inhibitor (PLX3397)<br>MEK inhibitors + Pan-RAF inhibitor<br>MTOR inhibitor + MEK inhibitors (Rapamycin + Sirolimus + 391210-10-9)<br>MTOR inhibitor + Pan-TK inhibitor (Sorafenib + Sirolimus)<br>Hormonal agent (Tamoxifen) | HCC<br>Glioma<br>MPNST<br>Melanoma<br>Glioma<br>Glioma<br>MPNST<br>MPNST<br>Any cancer types<br>MPNST<br>MPNST<br>PNF, MPNST<br>PNF<br>Melanoma<br>Melanoma<br>MPNST<br>MPNST |            | C<br>C<br>C<br>C<br>C<br>C<br>D<br>D<br>D<br>D<br>D<br>D<br>D<br>D<br>D<br>D |
|                |                                    | BRAF inhibitor (Vemurafenib)<br>BCR-ABL inhibitor (Dasatinib)<br>EGFR inhibitor (Erlotinib)<br>Retinoic Acids                                                                                                                                                                                                                                                                                                                                                                                                                                                                                                                                                                                                                             | Melanoma<br>Lung cancer<br>Lung cancer<br>Neuroblastoma                                                                                                                       | Resistant  | C<br>D<br>D<br>D                                                             |
| <i>PBRM1</i>   | p.G989C                            | EZH2 inhibitors                                                                                                                                                                                                                                                                                                                                                                                                                                                                                                                                                                                                                                                                                                                           | Any cancer types                                                                                                                                                              | Responsive | D                                                                            |
| <i>ERCC6</i>   | p.M867V                            | Platinum-based agent (Cisplatin)                                                                                                                                                                                                                                                                                                                                                                                                                                                                                                                                                                                                                                                                                                          | Ovarian cancer                                                                                                                                                                | Responsive | D                                                                            |
| <i>FBXW7</i>   | p.R505G (A265),<br>p.Q492QX (A265) | Steroids<br>MTOR inhibitor                                                                                                                                                                                                                                                                                                                                                                                                                                                                                                                                                                                                                                                                                                                | ALL<br>Any cancer types                                                                                                                                                       | Responsive | B<br>B                                                                       |
|                |                                    | EGFR mAb inhibitor (Panitumumab + Cetuximab)<br>Tubulin inhibitors                                                                                                                                                                                                                                                                                                                                                                                                                                                                                                                                                                                                                                                                        | CRC<br>Any cancer types                                                                                                                                                       | Resistant  | B<br>D                                                                       |
| <i>SMARCB1</i> | p.R53*                             | EZH2 inhibitors<br>HDAC inhibitors                                                                                                                                                                                                                                                                                                                                                                                                                                                                                                                                                                                                                                                                                                        | MRT<br>MRT                                                                                                                                                                    | Responsive | C<br>D                                                                       |
| <i>TP53</i>    | p.R273C                            | CD52 mAb antibody (Alemtuzumab)<br>Antibiotic/antineoplastic agent (Doxorubicin)<br>ATR inhibitor (AZD6738)                                                                                                                                                                                                                                                                                                                                                                                                                                                                                                                                                                                                                               | CLL<br>Bladder cancer<br>BCL                                                                                                                                                  | Responsive | B<br>B<br>C                                                                  |

|  |  |                                                                            |                |           |   |
|--|--|----------------------------------------------------------------------------|----------------|-----------|---|
|  |  | Nucleoside analog (Decitabine)                                             | AML, MPS       |           | C |
|  |  | WEE1 inhibitors                                                            | Ovarian cancer |           | C |
|  |  | 2-Aminoethyl Dihydrogen Phosphate                                          | Stomach cancer |           | C |
|  |  | Antibiotic/antineoplastic agent (Mytomycin C)                              | Bladder cancer |           | D |
|  |  | Amylin analogue (Pramlintide)                                              | Thymic cancer  |           | D |
|  |  | MEK inhibitors + Antibiotic/antineoplastic agent (Selumetinib + Docetaxel) | NSLC           |           | D |
|  |  | MDM2 inhibitors                                                            | Liposarcoma    |           | C |
|  |  | CDK4/CDK6 inhibitor (Abemaciclib)                                          | Breast cancer  |           | C |
|  |  | Platinum-based agent (Cisplatin)                                           | GCT            | Resistant | C |
|  |  | Hormonal agent (Tamoxifen)                                                 | Breast cancer  |           | C |
|  |  | Antibiotic/antineoplastic agent (Docetaxel)                                | NSLC           |           | D |

\*GIST = Gastrointestinal stromal tumors, HCC = Hepatocellular carcinoma, MPNST = Malignant peripheral nerve sheat tumor, PNF = Plexiform neurofibroma, CRC = Colorectal cancer, MRT = Malignant rhabdoid tumor, CLL = Chronic lymphocytic leukemia, ALL = Acute lymphoblastic leukemia, BCL = B cell lymphoma, AML = Acute myeloid leukemia, MPS = Myelodisplasic proliferative syndrome, NSLC = Non-small cell lung cancer, GCT = Germ cell tumor

#Level of evidence are obtained from the VICC integrated knowledge base, and are classified as follow : Level A - corresponds to biomarkers used in professional guidelines of FDA approved drugs, Level B - groups biomarkers observed in clinical trial, Level C -corresponds to biomarkers identified from small group studies or case studies, and Level D - biomarkers have been identified in pre-clinical studies.
