# Supplementary material for: Discovery of Novel Potential Prognostic Marker and Targeted Therapy to Overcome Chemotherapy Resistance in an Advanced Stage Wilms’ Tumor
Source: Preprints.org preprint supplement (doi:10.20944/preprints202404.1167.v1), 2024-04-17
Supplement: Supplementary file 2 [file supplementary]

**Supplementary Material:** Collaborators/Membership of the Thai Pediatric Cancer Atlas (TPCA)  
Consortium

**Co-chairs:** Suradej Hongeng<sup>1</sup>, Usanarat Anurathapan<sup>1</sup>, Somchai Chutipongtanate<sup>2</sup>, Surasak Sangkhathat<sup>3,4</sup>, Dumnoensun Pruksakorn<sup>5</sup>

**Tissue and clinical data source sites:** **Mahidol University** Usanarat Anurathapan<sup>1</sup>, Natini Jinawath<sup>6</sup>, Praewa Suthapot<sup>1</sup>, Nilubon Singhto<sup>6</sup>; **Prince of Songkla University** Surasak Sangkhathat<sup>3,4</sup>, Pongsakorn Choochuen<sup>3,4</sup>, Wanwisa Maneechay<sup>7</sup>, Yanisa klaewtanong<sup>4,3</sup>, Wararak Kaewrattana<sup>4,3</sup>; **Chiang Mai University** Dumnoensun Pruksakorn<sup>5</sup>, Pimpisa Teeyakasem<sup>8</sup>

**Cancer multi-omics data centers:** **Mahidol University** Wararat Chiangjong<sup>9</sup>, Praewa Suthapot<sup>1</sup>, Jirawan Weeraphan<sup>1</sup>, Nutkridta Pongsakul<sup>9</sup>; **Prince of Songkla University** Pongsakorn Choochuen<sup>3,4</sup>, Natakorn Nokchan<sup>3,4</sup>, Natthapon Khongcharoen<sup>3,4</sup>, Yanisa klaewtanong<sup>4,3</sup>, Wararak Kaewrattana<sup>4,3</sup>; **Chiang Mai University** Parunya Chaiyawat<sup>5</sup>, Nutnicha Sirikaew<sup>10</sup>, Viraporn Thepbundit<sup>10</sup>, Petlada Yongpitakwattana<sup>5</sup>

**Data analysis subgroup:** **Mahidol University** Wararat Chiangjong<sup>9</sup>, Praewa Suthapot<sup>1</sup>, Jirawan Weeraphan<sup>1</sup>, Nutkridta Pongsakul<sup>9</sup>; **Prince of Songkla University** Pongsakorn Choochuen<sup>3,4</sup>, Natakorn Nokchan<sup>3,4</sup>, Natthapon Khongcharoen<sup>3,4</sup>; **Chiang Mai University** Nutnicha Sirikaew<sup>10</sup>, Jeerawan Klangjorhor<sup>5,11</sup>, Sutpirat Moonmuang<sup>5,11</sup>, Tanyaluck Kampoun<sup>5</sup>, Viraporn Thepbundit<sup>10</sup>, Sasimol Udomruk<sup>5</sup>, Santhasiri Orrapin<sup>5</sup>, Warunyoo Phannasorn<sup>5</sup>, Thanapak Jaimalai<sup>5</sup>

<sup>1</sup>Division of Hematology and Oncology, Department of Pediatrics, Faculty of Medicine Ramathibodi Hospital, Mahidol University, Bangkok 10400, Thailand. <sup>2</sup>Division of Epidemiology, Department of Environmental and Public Health Sciences, University of Cincinnati College of Medicine, Cincinnati,

OH 45267, USA. <sup>3</sup>Department of Biomedical Sciences and Biomedical Engineering, Faculty of Medicine, Prince of Songkla University, Songkhla 90110, Thailand. <sup>4</sup>Translational Medicine Research Center, Faculty of Medicine, Prince of Songkla University, Songkhla 90110, Thailand. <sup>5</sup>Center of Multidisciplinary Technology for Advanced Medicine (CMUTEAM), Faculty of Medicine, Chiang Mai University, Chiang Mai 50200, Thailand. <sup>6</sup>Ramathibodi Comprehensive Cancer Center, Faculty of Medicine Ramathibodi Hospital, Mahidol University, Bangkok 10400, Thailand. <sup>7</sup>Innovation Center, Faculty of Medicine, Prince of Songkla University, Songkhla 90110, Thailand. <sup>8</sup>Research Administration Section, Faculty of Medicine, Chiang Mai University, Chiang Mai 50200, Thailand. <sup>9</sup>Pediatric Translational Research Unit, Department of Pediatrics, Faculty of Medicine Ramathibodi Hospital, Mahidol University, Bangkok 10400, Thailand. <sup>10</sup>Department of Biochemistry, Faculty of Medicine, Chiang Mai University, Chiang Mai 50200, Thailand. <sup>11</sup>Office of research administration, Chiang Mai University, Chiang Mai 50200, Thailand.
