# Supplementary material for: Discovery of Novel Potential Prognostic Marker and Targeted Therapy to Overcome Chemotherapy Resistance in an Advanced Stage Wilms’ Tumor
Source: Preprints.org preprint supplement (doi:10.20944/preprints202404.1167.v1), 2024-04-17
Supplement: Supplementary file 3 [file supplementary]

| Sample ID | COG stage | Histology   | Chemotherapy regimen |
|-----------|-----------|-------------|----------------------|
| A055      | III       | Favorable   | ThaiPOG-WT-1302      |
| A159      | III       | Favorable   |                      |
| A171      | III       | Favorable   |                      |
| A342      | III       | Favorable   |                      |
| A265      | IV        | Unfavorable | ThaiPOG-WT-1303      |
| A458      | IV        | Unfavorable |                      |
| A203      | V         | Unfavorable | ThaiPOG-WT-1305      |

| Drug                                                                                    | Dosage          |                 |                                                    |
|-----------------------------------------------------------------------------------------|-----------------|-----------------|----------------------------------------------------|
|                                                                                         | Age < 12 months | Age ≥ 12 months | BW ≥ 30 kg                                         |
| <b>Regimen : ThaiPOG-WT-1302</b>                                                        |                 |                 |                                                    |
| AMD* = Actinomycin-D X 1 day<br>Begin within 5 days post surgery                        | 0.023 mg/kg IV  | 0.045 mg/kg IV  | 1.35 mg/m <sup>2</sup> IV<br>(Maximum dose 2.3 mg) |
| VCR1 = Vincristine X 1 day<br>Begin within 7 days post surgery                          | 0.025 mg/kg IV  | 0.05 mg/kg IV   | 1.5 mg/m <sup>2</sup> IV<br>(Maximum dose 2 mg)    |
| VCR2 = Vincristine X 1 day                                                              | 0.034 mg/kg IV  | 0.067 mg/kg IV  | 2 mg/m <sup>2</sup> IV<br>(Maximum dose 2 mg)      |
| DOX1* = Doxorubicin X 1 day                                                             | 0.75 mg/kg IV   | 1.5 mg/kg IV    | 45 mg/m <sup>2</sup> IV                            |
| DOX2 = Doxorubicin X 1 day                                                              | 0.5 mg/kg IV    | 1 mg/kg IV      | 30 mg/m <sup>2</sup> IV                            |
| * Actinomycin-D and Doxorubicin doses should be decreased 50% during radiation therapy. |                 |                 |                                                    |
| <b>Regimen : ThaiPOG-WT-1303</b>                                                        |                 |                 |                                                    |
| DOX* = Doxorubicin X 1 day<br>Begin within 5 days post surgery                          | 0.75 mg/kg IV   | 1.5 mg/kg IV    | 45 mg/m <sup>2</sup> IV                            |
| VCR1 = Vincristine X 1 day<br>Begin within 7 days post surgery                          | 0.025 mg/kg IV  | 0.05 mg/kg IV   | 1.5 mg/m <sup>2</sup> IV                           |
| VCR2 = Vincristine X 1 day                                                              | 0.034 mg/kg IV  | 0.067 mg/kg IV  | 2 mg/m <sup>2</sup> IV<br>(Maximum dose 2 mg)      |
| CTX5** = Cyclophosphamide X 5 days                                                      | 7.35 mg/kg/day  | 14.7 mg/kg/day  | 440 mg/m <sup>2</sup> /day                         |
| CTX3** = Cyclophosphamide X 3 days                                                      |                 |                 |                                                    |
| ETOP = Etoposide X 5 days                                                               | 1.65 mg/kg/day  | 3.3 mg/kg/day   | 100 mg/m <sup>2</sup> /day                         |
| * Doxorubicin doses should be decreased 50% during radiation therapy.                   |                 |                 |                                                    |
| ** G-CSF 5 mcg/kg/day starting 24 hours after CTX3/CTX5 until ANC recovery.             |                 |                 |                                                    |

| Drug                                                                  | Dosage                                  |                              |                              |
|-----------------------------------------------------------------------|-----------------------------------------|------------------------------|------------------------------|
|                                                                       | Age < 12 months                         | Age ≥ 12 months              | BW ≥ 30 kg                   |
| <b>Regimen : ThaiPOG-WT-1305</b>                                      |                                         |                              |                              |
| DOX* = Doxorubicin IV<br>over 15-120 min on day 1                     | 1.5 mg/kg/day                           | 45 mg/m <sup>2</sup> /day    | 45 mg/m <sup>2</sup> /day    |
| VCR = Vincristine IV on day 1<br>(Maximum dose 2 mg)                  | 0.025 mg/kg IV                          | 0.05 mg/kg IV                | 1.5 mg/m <sup>2</sup> IV     |
| CTX1 = Cyclophosphamide IV<br>over 1 hr on Day 1-4                    | 14.7 mg/kg/day                          | 440 mg/m <sup>2</sup> /day   | 440 mg/m <sup>2</sup> /day   |
| CTX2 = Cyclophosphamide IV<br>over 1 hr on Day 1                      | 40 mg/kg/day                            | 1,200 mg/m <sup>2</sup> /day | 1,200 mg/m <sup>2</sup> /day |
| Carbo = Carboplatin IV over 1 hr<br>on Day 1 Dose based on GFR        | See carboplatin dosage adjustment below |                              |                              |
| ETOP = Etoposide IV over 1 hr<br>on day 1-4                           | 3.3 mg/kg/day                           | 100 mg/m <sup>2</sup> /day   | 100 mg/m <sup>2</sup> /day   |
| * Doxorubicin doses should be decreased 50% during radiation therapy. |                                         |                              |                              |

| Carboplatin IV over 1 hr          |                                             |
|-----------------------------------|---------------------------------------------|
| GFR ( mL/min/1.73m <sup>2</sup> ) | Dose                                        |
| >150                              | 560 mg/m <sup>2</sup> (18.7 mg/kg if <1 yr) |
| 100-150                           | 500 mg/m <sup>2</sup> (16.6 mg/kg if <1 yr) |
| 75-99                             | 370 mg/m <sup>2</sup> (12.3 mg/kg if <1 yr) |
| 50-74                             | 290 mg/m <sup>2</sup> (9.7 mg/kg if <1 yr)  |
| 30-49                             | 200 mg/m <sup>2</sup> (6.7 mg/kg if <1 yr)  |
| <30                               | Hold Carboplatin                            |
