# Supplementary material for: Discovery of Novel Potential Prognostic Marker and Targeted Therapy to Overcome Chemotherapy Resistance in an Advanced Stage Wilms’ Tumor
Source: Preprints.org preprint supplement (doi:10.20944/preprints202404.1167.v1), 2024-04-17
Supplement: Supplementary file 4 [file supplementary]

| Supplementary Table S1 Genes associated with clinicopathological features |                   |                  |         |
|---------------------------------------------------------------------------|-------------------|------------------|---------|
| Genes                                                                     | Histology         |                  | p-value |
|                                                                           | Unfavorable (N:7) | Favorable (N:36) |         |
| <i>MMP17</i>                                                              | 3/7 (42.86%)      | 0/36 (0.00%)     | 0.003   |
| <i>OR6C70</i>                                                             | 3/7 (42.86%)      | 0/36 (0.00%)     | 0.003   |
| <i>MPDZ</i>                                                               | 4/7 (57.14%)      | 2/36 (5.56%)     | 0.004   |
| <i>FLG2</i>                                                               | 3/7 (42.86%)      | 1/36 (2.78%)     | 0.010   |
| <i>KIF13A</i>                                                             | 3/7 (42.86%)      | 1/36 (2.78%)     | 0.010   |
| <i>KRT6B</i>                                                              | 3/7 (42.86%)      | 1/36 (2.78%)     | 0.010   |
| <i>MEGF8</i>                                                              | 3/7 (42.86%)      | 1/36 (2.78%)     | 0.010   |
| <i>RFC1</i>                                                               | 3/7 (42.86%)      | 1/36 (2.78%)     | 0.010   |
| <i>APOB</i>                                                               | 4/7 (57.14%)      | 4/36 (11.11%)    | 0.015   |
| <i>CMYA5</i>                                                              | 4/7 (57.14%)      | 4/36 (11.11%)    | 0.015   |
| <i>ATG2A</i>                                                              | 3/7 (42.86%)      | 2/36 (5.56%)     | 0.024   |
| <i>CNTNAP3B</i>                                                           | 3/7 (42.86%)      | 2/36 (5.56%)     | 0.024   |
| <i>EXD3</i>                                                               | 3/7 (42.86%)      | 2/36 (5.56%)     | 0.024   |
| <i>NBPF15</i>                                                             | 3/7 (42.86%)      | 2/36 (5.56%)     | 0.024   |
| <i>PKD1</i>                                                               | 3/7 (42.86%)      | 2/36 (5.56%)     | 0.024   |
| <i>SAMD11</i>                                                             | 3/7 (42.86%)      | 2/36 (5.56%)     | 0.024   |
| <i>WDR87</i>                                                              | 3/7 (42.86%)      | 2/36 (5.56%)     | 0.024   |
| <i>GOLGA6L9</i>                                                           | 5/7 (71.43%)      | 10/36 (27.78%)   | 0.040   |
| <i>AKAP11</i>                                                             | 3/7 (42.86%)      | 3/36 (8.33%)     | 0.045   |
| <i>CFAP54</i>                                                             | 3/7 (42.86%)      | 3/36 (8.33%)     | 0.045   |
| <i>EML6</i>                                                               | 3/7 (42.86%)      | 3/36 (8.33%)     | 0.045   |
| <i>PTPN13</i>                                                             | 3/7 (42.86%)      | 3/36 (8.33%)     | 0.045   |
| <i>TEX15</i>                                                              | 3/7 (42.86%)      | 3/36 (8.33%)     | 0.045   |
| Genes                                                                     | Syndromic feature |                  | p-value |
|                                                                           | Yes (N:10)        | No (N:33)        |         |
| <i>PRSS2</i>                                                              | 7/10 (70.00%)     | 6/33 (18.18%)    | 0.004   |
| <i>PRSS1</i>                                                              | 7/10 (70.00%)     | 7/33 (21.21%)    | 0.007   |
| <i>ATG14</i>                                                              | 4/10 (40.00%)     | 1/33 (3.03%)     | 0.007   |
| <i>CEP170B</i>                                                            | 4/10 (40.00%)     | 1/33 (3.03%)     | 0.007   |
| <i>AKR7A3</i>                                                             | 3/10 (30.00%)     | 0/33 (0.00%)     | 0.010   |
| <i>ARID1A</i>                                                             | 3/10 (30.00%)     | 0/33 (0.00%)     | 0.010   |
| <i>C20orf144</i>                                                          | 3/10 (30.00%)     | 0/33 (0.00%)     | 0.010   |

|                 |                 |                   |         |
|-----------------|-----------------|-------------------|---------|
| <i>DENND1C</i>  | 3/10 (30.00%)   | 0/33 (0.00%)      | 0.010   |
| <i>FAM107A</i>  | 3/10 (30.00%)   | 0/33 (0.00%)      | 0.010   |
| <i>GAA</i>      | 3/10 (30.00%)   | 0/33 (0.00%)      | 0.010   |
| <i>METTL14</i>  | 3/10 (30.00%)   | 0/33 (0.00%)      | 0.010   |
| <i>PAMR1</i>    | 3/10 (30.00%)   | 0/33 (0.00%)      | 0.010   |
| <i>TNIK</i>     | 3/10 (30.00%)   | 0/33 (0.00%)      | 0.010   |
| <i>ACSM2A</i>   | 4/10 (40.00%)   | 2/33 (6.06%)      | 0.020   |
| <i>AKNA</i>     | 4/10 (40.00%)   | 2/33 (6.06%)      | 0.020   |
| <i>NBPF4</i>    | 4/10 (40.00%)   | 2/33 (6.06%)      | 0.020   |
| <i>ABCC12</i>   | 3/10 (30.00%)   | 1/33 (3.03%)      | 0.034   |
| <i>ATP10B</i>   | 3/10 (30.00%)   | 1/33 (3.03%)      | 0.034   |
| <i>BRD8</i>     | 3/10 (30.00%)   | 1/33 (3.03%)      | 0.034   |
| <i>CEP295</i>   | 3/10 (30.00%)   | 1/33 (3.03%)      | 0.034   |
| <i>CES5A</i>    | 3/10 (30.00%)   | 1/33 (3.03%)      | 0.034   |
| <i>CIT</i>      | 3/10 (30.00%)   | 1/33 (3.03%)      | 0.034   |
| <i>CRYBG3</i>   | 3/10 (30.00%)   | 1/33 (3.03%)      | 0.034   |
| <i>DAG1</i>     | 3/10 (30.00%)   | 1/33 (3.03%)      | 0.034   |
| <i>DAZAP2</i>   | 3/10 (30.00%)   | 1/33 (3.03%)      | 0.034   |
| <i>FAM214B</i>  | 3/10 (30.00%)   | 1/33 (3.03%)      | 0.034   |
| <i>GAK</i>      | 3/10 (30.00%)   | 1/33 (3.03%)      | 0.034   |
| <i>IFNL1</i>    | 3/10 (30.00%)   | 1/33 (3.03%)      | 0.034   |
| <i>MYH15</i>    | 3/10 (30.00%)   | 1/33 (3.03%)      | 0.034   |
| <i>MYH4</i>     | 3/10 (30.00%)   | 1/33 (3.03%)      | 0.034   |
| <i>MYH7B</i>    | 3/10 (30.00%)   | 1/33 (3.03%)      | 0.034   |
| <i>NUP188</i>   | 3/10 (30.00%)   | 1/33 (3.03%)      | 0.034   |
| <i>SUN1</i>     | 3/10 (30.00%)   | 1/33 (3.03%)      | 0.034   |
| <i>SVEP1</i>    | 3/10 (30.00%)   | 1/33 (3.03%)      | 0.034   |
| <i>SYN3</i>     | 3/10 (30.00%)   | 1/33 (3.03%)      | 0.034   |
| <i>KRTAP5-7</i> | 8/10 (80.00%)   | 13/33 (39.39%)    | 0.034   |
| <i>CHD8</i>     | 4/10 (40.00%)   | 3/33 (9.09%)      | 0.040   |
| <i>PCDHB14</i>  | 4/10 (40.00%)   | 3/33 (9.09%)      | 0.040   |
| Genes           | Laterality      |                   | p-value |
|                 | Bilateral (N:5) | Unilateral (N:38) |         |
| <i>AKR7A3</i>   | 3/5 (60.00%)    | 0/38 (0.00%)      | 0.001   |
| <i>ARID1A</i>   | 3/5 (60.00%)    | 0/38 (0.00%)      | 0.001   |

|                |              |                |       |
|----------------|--------------|----------------|-------|
| <i>METTL14</i> | 3/5 (60.00%) | 0/38 (0.00%)   | 0.001 |
| <i>BRD8</i>    | 3/5 (60.00%) | 1/38 (2.63%)   | 0.003 |
| <i>ZNF683</i>  | 3/5 (60.00%) | 2/38 (5.26%)   | 0.008 |
| <i>PRSS2</i>   | 4/5 (80.00%) | 9/38 (23.68%)  | 0.023 |
| <i>BTBD7</i>   | 3/5 (60.00%) | 4/38 (10.53%)  | 0.024 |
| <i>CHD8</i>    | 3/5 (60.00%) | 4/38 (10.53%)  | 0.024 |
| <i>PRSS1</i>   | 4/5 (80.00%) | 10/38 (26.32%) | 0.032 |
| <i>GLOD4</i>   | 3/5 (60.00%) | 5/38 (13.16%)  | 0.037 |
|                |              |                |       |
